# Supplementary material
Source: PubMed Central journal article supplement (PMC7383077)
Supplement: jnm231340SupplementalData.pdf [file jnm231340SupplementalData.pdf]

### Supplemental Figure 1

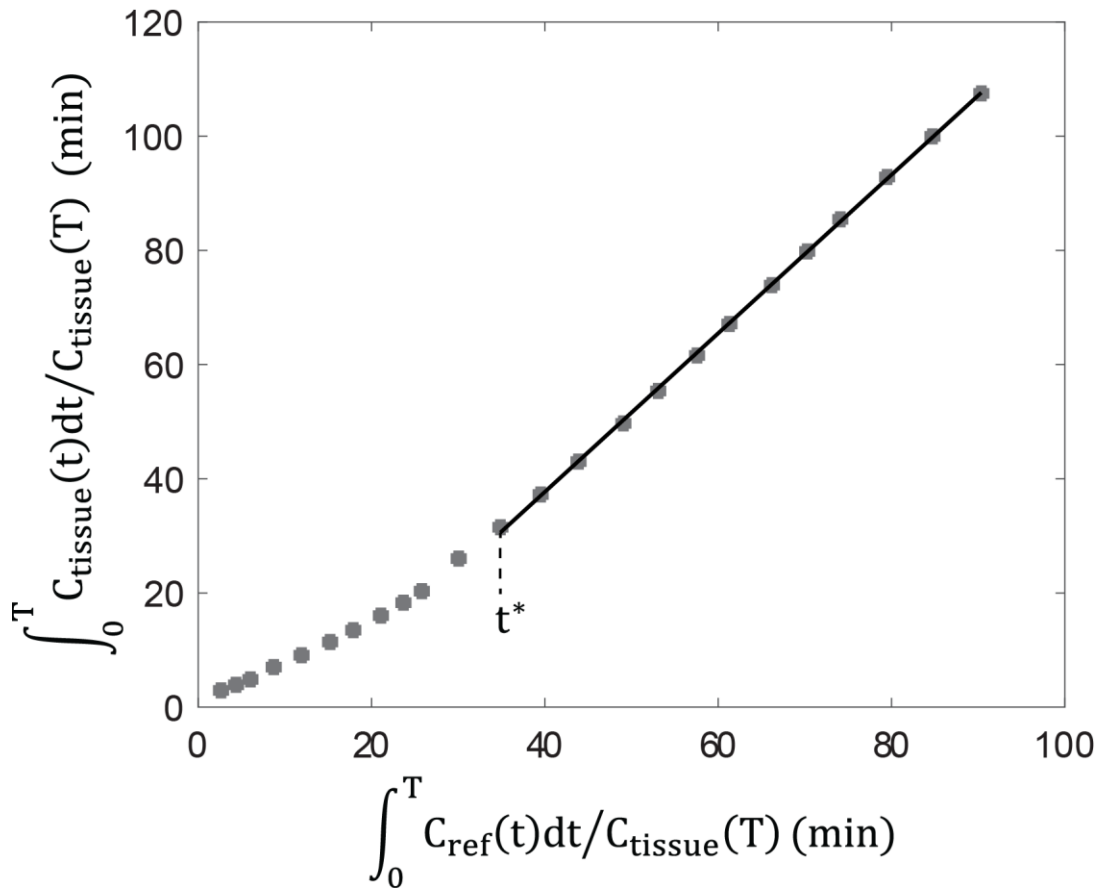

Logan plot with reference region in the normal appearing white matter of a representative patient with multiple sclerosis. The DVR is estimated from the following equation:  $\int_0^T C_{tissue}(t)dt / C_{tissue}(T) = DVR \cdot \int_0^T C_{ref}(t)dt / C_{tissue}(T) + const$ , where  $C_{tissue}(t)$  is the activity concentration in the voxel under analysis and  $C_{ref}(t)$  is the activity concentration in the reference region extracted using a supervised clustering algorithm. The linear fit (black line) was obtained after an equilibration time of  $t^* = 27.5$  min.

## Supplemental Table 1

Difference in mean <sup>18</sup>F-DPA-714 DVR values and percentages of DPA+ voxels between ROIs (NAWM, perilesional area, T2 lesions, and T1-se lesions).

| 18F-DPA-714 DVR          |       |      |       |              |        |       |
|--------------------------|-------|------|-------|--------------|--------|-------|
| test                     | Coef. | SE   | t     | p            | 95% CI |       |
| NAWM in MS vs WM in HC   | 0.07  | 0.02 | 3.35  | 0.002        | 0.03   | 0.11  |
| test                     | Coef. | SE   | z     | p (bonf)     | 95% CI |       |
| PERI in MS vs NAWM in MS | 0.09  | 0.03 | 3.60  | <b>0.002</b> | 0.03   | 0.16  |
| LES in MS vs NAWM in MS  | 0.07  | 0.03 | 2.63  | 0.052        | -0.00  | 0.14  |
| BH in MS vs NAWM in MS   | 0.11  | 0.03 | 4.19  | <b>0.000</b> | 0.04   | 0.19  |
| LES in MS vs PERI in MS  | -0.03 | 0.03 | -0.97 | 1.000        | -0.10  | 0.04  |
| BH in MS vs PERI in MS   | 0.02  | 0.03 | 0.71  | 1.000        | -0.05  | 0.09  |
| BH in MS vs LES in MS    | 0.05  | 0.03 | 1.65  | 0.595        | -0.03  | 0.12  |
| Percentage of DPA+ voxel |       |      |       |              |        |       |
| test                     | Coef. | SE   | t     | p            | 95% CI |       |
| NAWM in MS vs WM in HC   | 9.96  | 2.47 | 4.03  | <b>0.000</b> | 5.00   | 14.92 |
| test                     | Coef. | SE   | z     | p (bonf)     | 95% CI |       |
| PERI in MS vs NAWM in MS | 13.24 | 2.64 | 5.02  | <b>0.000</b> | 6.28   | 20.20 |
| LES in MS vs NAWM in MS  | 20.08 | 2.64 | 7.61  | <b>0.000</b> | 13.12  | 27.04 |
| BH in MS vs NAWM in MS   | 26.90 | 2.69 | 10.02 | <b>0.000</b> | 19.82  | 33.99 |
| LES in MS vs PERI in MS  | 6.84  | 2.64 | 2.59  | 0.057        | -0.12  | 13.80 |
| BH in MS vs PERI in MS   | 13.67 | 2.69 | 5.09  | <b>0.000</b> | 6.58   | 20.75 |
| BH in MS vs LES in MS    | 6.83  | 2.69 | 2.54  | 0.066        | -0.26  | 13.91 |

## Supplemental Table 2

Difference in the number of DPA-active/inactive lesions between MS subgroups.

|             | Predictors   | test     | Coef. | SE   | z     | p (bonf) | 95% CI |      |
|-------------|--------------|----------|-------|------|-------|----------|--------|------|
| T2 active   | MS subgroups | RR vs PP | 3.43  | 2.16 | 1.59  | 0.345    | -1.81  | 8.67 |
|             |              | SP vs PP | 4.13  | 1.76 | 2.35  | 0.061    | -0.13  | 8.39 |
|             |              | SP vs RR | 0.70  | 1.77 | 0.40  | 1.000    | -3.58  | 4.98 |
| T2 inactive | MS subgroups | RR vs PP | -1.72 | 1.40 | -1.23 | 0.664    | -5.10  | 1.67 |
|             |              | SP vs PP | 0.80  | 1.13 | 0.71  | 1.000    | -1.95  | 3.55 |
|             |              | SP vs RR | 2.52  | 1.14 | 2.21  | 0.087    | -0.25  | 5.28 |

### Supplemental Table 3

Associations between parameters of interest and EDSS step change over the 2 years preceding study entry or EDSS at study entry.

|                  | Predictors                                     | Coef.    | SE      | z     | P<br>(bonf)  | 95% CI   |         |
|------------------|------------------------------------------------|----------|---------|-------|--------------|----------|---------|
| EDSS step change | T2 lesion load                                 | 0.00     | 0.00    | 1.20  | 1.00         | 0.00     | 0.00    |
|                  | T1-se lesion load                              | 0.00     | 0.00    | 0.81  | 1.00         | -0.00    | 0.00    |
|                  | number of T2 lesions                           | 0.04     | 0.02    | 1.91  | 0.513        | -0.00    | 0.08    |
|                  | percentage of DPA+ voxels in NAWM              | 0.15     | 0.04    | 3.47  | <b>0.009</b> | 0.06     | 0.23    |
|                  | percentage of DPA+ voxels in perilesional area | 0.07     | 0.03    | 2.64  | 0.072        | 0.02     | 0.13    |
|                  | percentage of DPA+ voxels in T2 lesions        | 0.05     | 0.02    | 2.15  | 0.279        | 0.00     | 0.09    |
|                  | percentage of DPA+ voxels in T1-se lesions     | 0.06     | 0.02    | 2.89  | <b>0.036</b> | 0.02     | 0.09    |
|                  | number of DPA-active lesions                   | 0.12     | 0.03    | 3.41  | <b>0.009</b> | 0.05     | 0.19    |
|                  | number of DPA-inactive lesions                 | -0.22    | 0.09    | -2.59 | 0.081        | -0.39    | -0.05   |
| EDSS             | T2 lesion load                                 | 7.53e-7  | 2.65e-5 | 0.03  | 0.977        | -5.11e-5 | 5.26e-5 |
|                  | T1-se lesion load                              | -1.71e-5 | 8.54e-5 | -0.20 | 0.842        | -1.85e-4 | 1.50e-4 |
|                  | number of T2 lesions                           | -0.01    | 0.02    | -0.80 | 0.424        | -0.05    | 0.02    |
|                  | percentage of DPA+ voxels in NAWM              | -0.03    | 0.03    | -0.78 | 0.433        | -0.09    | 0.04    |
|                  | percentage of DPA+ voxels in perilesional area | -0.01    | 0.02    | -0.35 | 0.726        | -0.06    | 0.04    |
|                  | percentage of DPA+ voxels in T2 lesions        | -0.01    | 0.02    | -0.43 | 0.664        | -0.05    | 0.03    |
|                  | percentage of DPA+ voxels in T1-se lesions     | 0.00     | 0.01    | 0.15  | 0.879        | 0-.03    | 0.03    |
|                  | number of DPA-active lesions                   | -0.02    | 0.03    | -0.65 | 0.513        | -0.07    | 0.03    |
|                  | number of DPA-inactive lesions                 | -0.03    | 0.06    | -0.56 | 0.576        | -0.15    | 0.08    |
